# Supplementary material
Source: Springer Nature journal article supplement (https://www.springermedizin.de/resource/supplementary/12903_2010_173_MOESM3_ESM.pdf/9516354)

**If you exclude the examination you will have to day, what is your plans for going to the dentist in the future?**

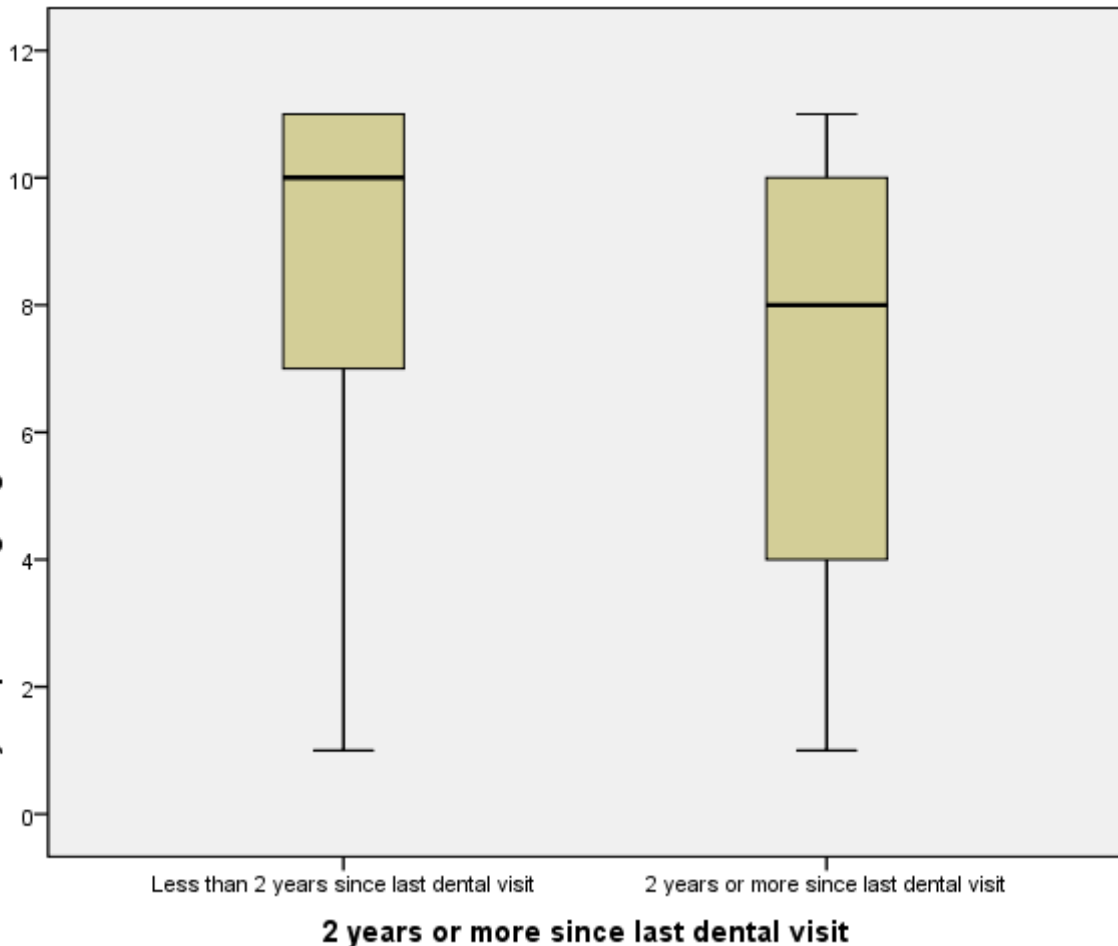

Supplement: MOESM3 [file 9516354]
